# Supplementary material for: Correlating cation ordering and voltage fade in a lithium–manganese-rich lithium-ion battery cathode oxide: a joint magnetic susceptibility and TEM study
Source: Royal Society of Chemistry journal article supplement (doi:10.1039/c3cp53658k), 2013-01-01
Supplement: c3cp53658k.pdf [file c3cp53658k.pdf]

# Correlating Cation Ordering and Voltage Fade in a Lithium-Manganese-Rich Lithium-Ion Battery Cathode Oxide: a Joint Magnetic Susceptibility and TEM Study

Debasish Mohanty,<sup>a,\*</sup> Athena S. Sefat,<sup>a</sup> Jianlin Li,<sup>b</sup> Roberta A. Meisner,<sup>a</sup> Adam J. Rondinone,<sup>c</sup> E. Andrew Payzant,<sup>d</sup> Daniel P. Abraham,<sup>c</sup> David L. Wood III,<sup>b</sup> and Claus Daniel<sup>b,f,\*</sup>

<sup>a</sup>Materials Science and Technology Division, Oak Ridge National Laboratory, Oak Ridge, TN 37931, USA <sup>b</sup>Energy and Transportation Science Division, Oak Ridge National Laboratory, Oak Ridge, TN 37831, USA <sup>c</sup>Center for Nanophase Materials Sciences, Oak Ridge National Laboratory, Oak Ridge, TN 37931, USA <sup>d</sup>Chemical and Engineering Materials Division, Oak Ridge National Laboratory, Oak Ridge, TN 37831, USA <sup>e</sup>Chemical Sciences and Engineering Division, Argonne National Laboratory, Argonne, Illinois 60439, USA <sup>f</sup>Bredesen Center for Interdisciplinary Research and Graduate Education, University of Tennessee, Knoxville, TN 37996, USA.

## Supplementary Information

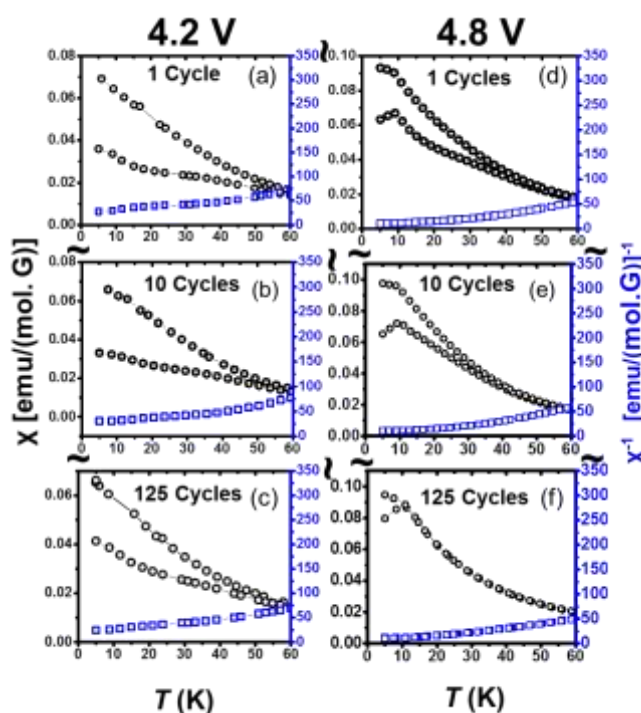

Figure S1: Temperature dependence of the molar magnetic susceptibility in the temperature region 5K-60K of cycled LMR-NMC when cycled at a cutoff voltage 4.2V (a-c) and 4.8V (d-f). During 4.2V cycling the bifurcation of FC and ZFC can be observed after 1 cycle (a), 10 cycles(b), and after 125 cycles (c). However, while cycling at 4.8V, the bifurcation of FC and ZFC suppress after subsequent 1 and 10 cycles ( d-e) and vanishes after 125 cycles (f).

Table TS1: magnetic moments of Mn, Co, and Ni at different oxidation states and in low-spin (LS), and high-spin (HS) configurations

|                                                  | Ni <sup>2+</sup><br>HS/LS | Ni <sup>3+</sup><br>HS | Ni <sup>3+</sup><br>LS | Co <sup>3+</sup><br>HS | Co <sup>3+</sup><br>LS | Co <sup>4+</sup><br>HS | Co <sup>4+</sup><br>LS | Ni <sup>4+</sup><br>HS | Ni <sup>4+</sup><br>LS | Mn <sup>3+</sup><br>HS | Mn <sup>3+</sup><br>LS | Mn <sup>4+</sup><br>HS/LS | Mn <sup>5+</sup><br>HS/LS | Mn <sup>6+</sup><br>LS | Mn <sup>2+</sup><br>LS | Mn <sup>2+</sup><br>HS |
|--------------------------------------------------|---------------------------|------------------------|------------------------|------------------------|------------------------|------------------------|------------------------|------------------------|------------------------|------------------------|------------------------|---------------------------|---------------------------|------------------------|------------------------|------------------------|
| Number of unpaired electrons (n)                 | 2                         | 3                      | 1                      | 4                      | 0                      | 5                      | 1                      | 4                      | 0                      | 4                      | 2                      | 3                         | 2                         | 1                      | 1                      | 5                      |
| Spin-only magnetic moment (μ <sub>S</sub> ) B.M. | 2.8                       | 3.9                    | 1.7                    | 4.9                    | 0                      | 5.9                    | 1.7                    | 4.9                    | 0                      | 4.9                    | 2.8                    | 3.9                       | 2.8                       | 1.7                    | 1.7                    | 5.9                    |

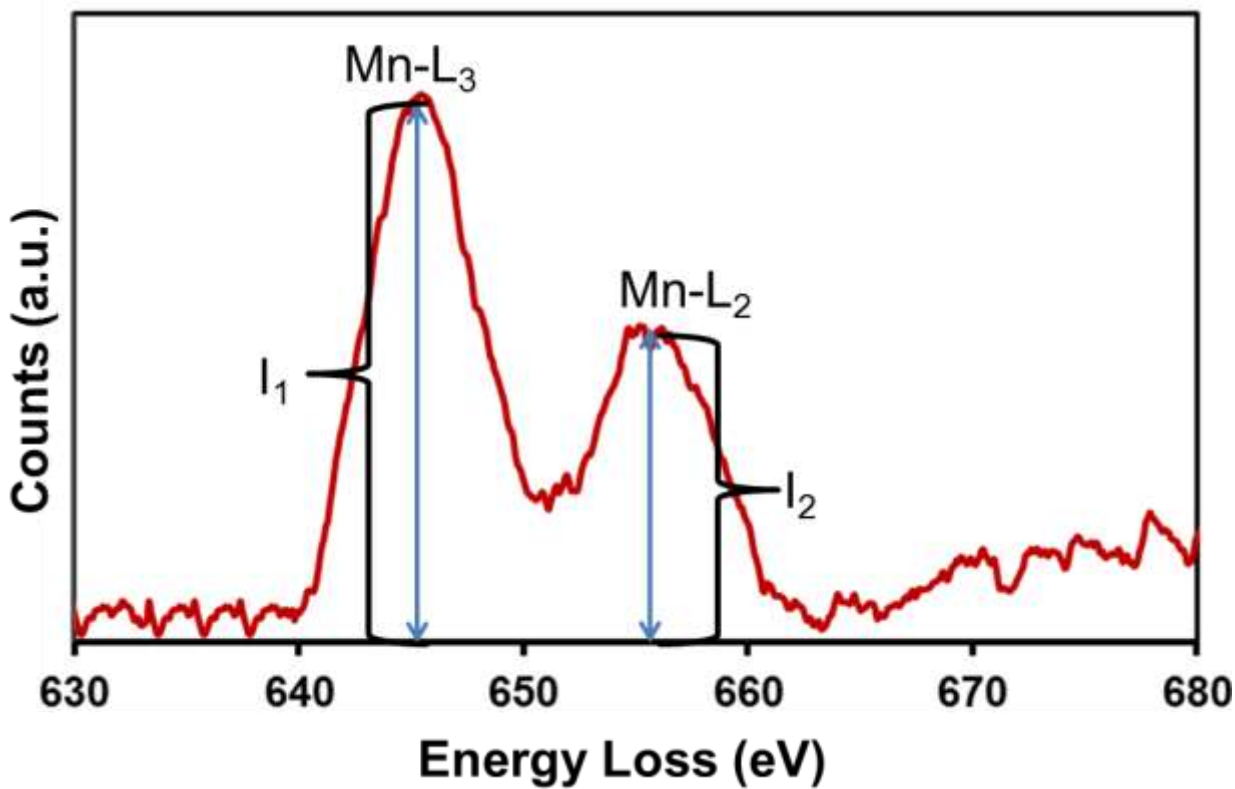

Figure S2: EELS spectra collected from the pristine LMR-NMC cathode oxide. The Mn L<sub>3</sub>/L<sub>2</sub> ratio was calculated as I<sub>1</sub>/I<sub>2</sub>. Where I<sub>1</sub> is the intensity of Mn-L<sub>3</sub> and I<sub>2</sub> is the intensity of Mn-L<sub>2</sub> white lines. This procedure was adopted to calculate the L<sub>3</sub>/L<sub>2</sub> ratio for all the materials.
